# Supplementary material
Source: PubMed Central journal article supplement (PMC3882119)
Supplement: NIHMS523637-supplement-01.pdf [file NIHMS523637-supplement-01.pdf]

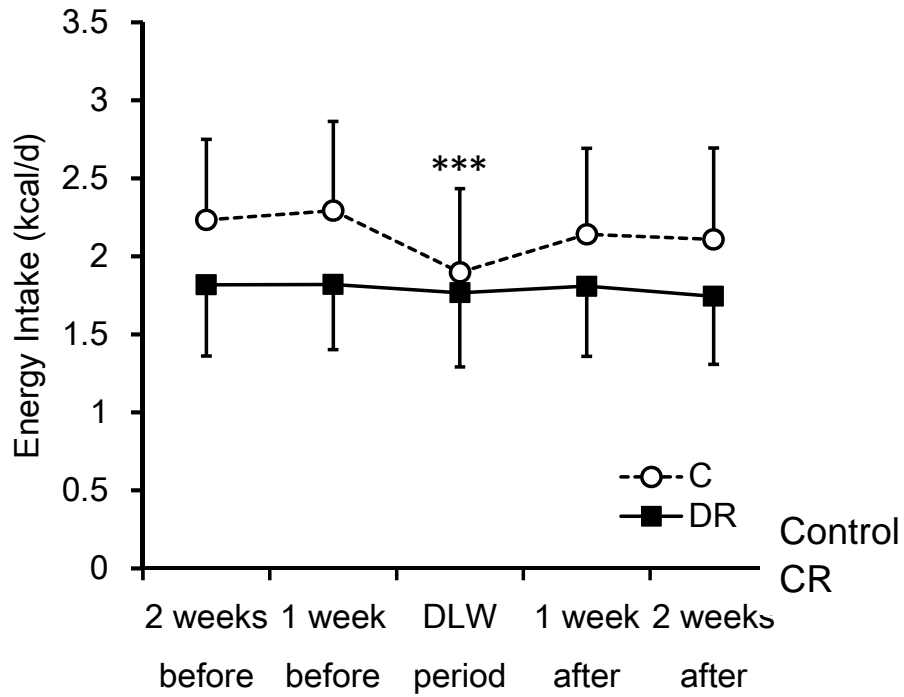

Supplementary Figure 1. Time-series of energy intake for control (C) and calorie restriction (CR) groups before, during, and after doubly labeled water (DLW) experiments. C monkeys ate less food under *ad lib.* conditions during recovery from anesthesia and handling required for the DLW administration and body composition assessment (\*\*\*)  $P < 0.001$  compared with other periods), but CR animals were unaffected. Data are shown as Mean  $\pm$  SD.
